# Supplementary material for: Can we rely on out-of-hospital blood samples? A prospective interventional study on the pre-analytical stability of blood samples under prehospital emergency medicine conditions
Source: PubMed Central journal article supplement (PMC5336613; doi:10.1186/s13049-017-0371-3), 2017-03-04

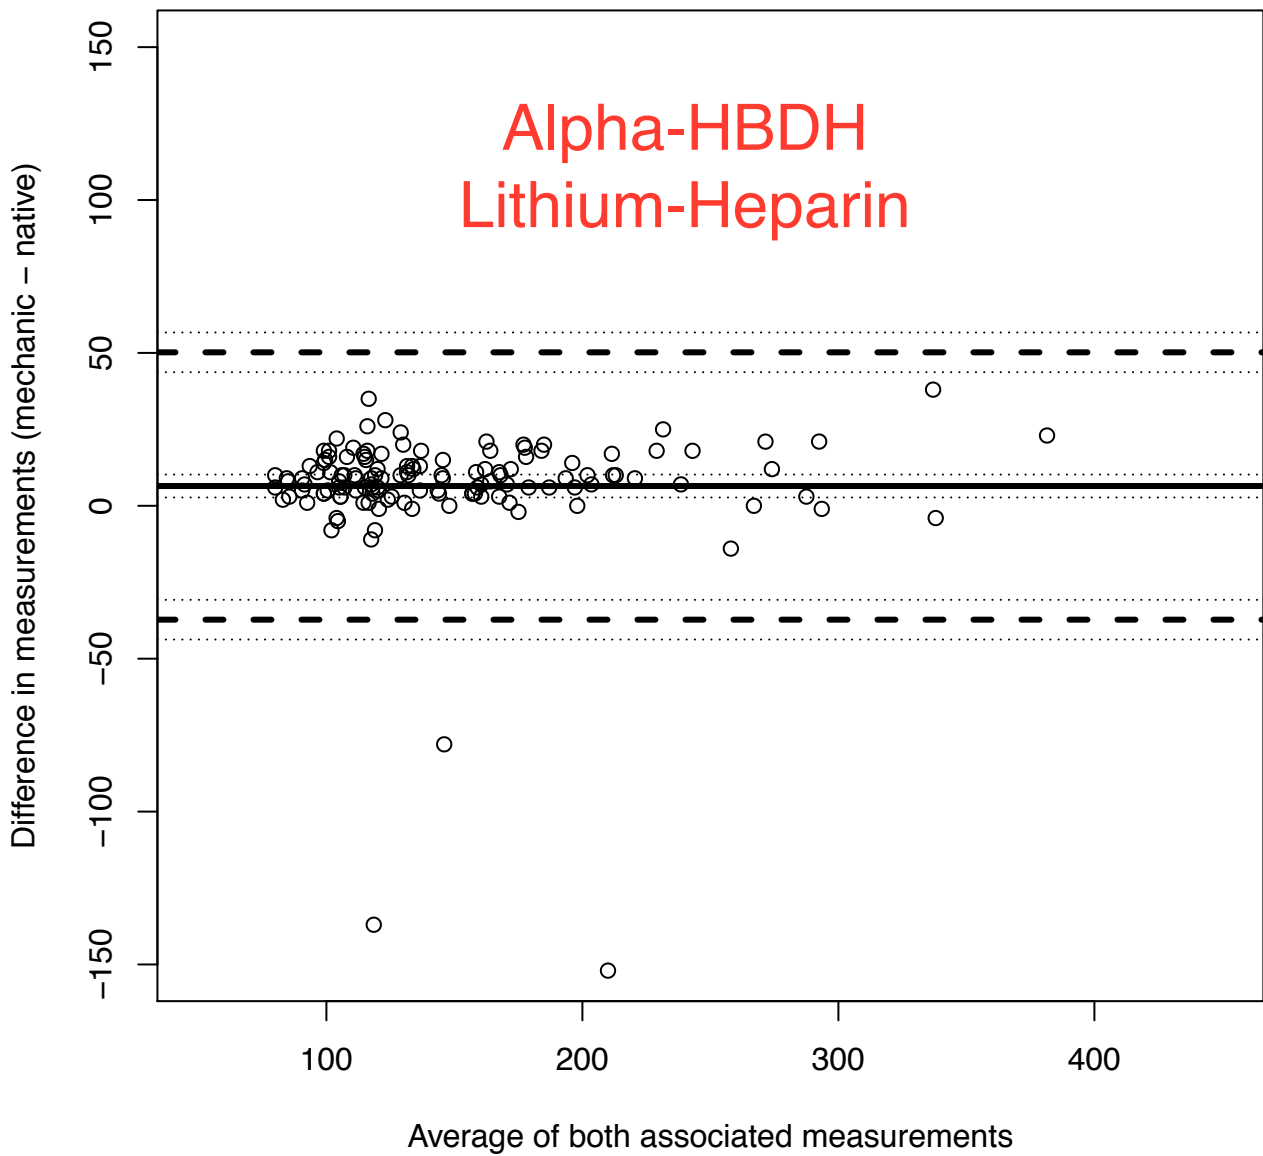

Supplement: 13049_2017_371_MOESM8_ESM.pdf [file 13049_2017_371_MOESM8_ESM.pdf]
